# Supplementary material for: The role of Glu498 in the dioxygen reactivity of CotA-laccase from Bacillus subtilis
Source: Royal Society of Chemistry journal article supplement (doi:10.1039/b922734b), 2010-01-01
Supplement: b922734b.pdf [file b922734b.pdf]

SUPPLEMENTARY MATERIAL

**Table S1 Refinement and quality of refined models. The Ramachandran analysis<sup>1</sup> was determined by Rampage<sup>2</sup>.**

|                                                | <b>E498D</b> | <b>E498T</b> | <b>E498L</b> |
|------------------------------------------------|--------------|--------------|--------------|
| No. of protein atoms                           | 4122         | 4119         | 4150         |
| No. of solvent atoms                           | 495          | 518          | 645          |
| No. of hetero atoms                            | 4            | 4            | 4            |
| Final R-factor                                 | 0.177        | 0.177        | 0.175        |
| Final free R-factor                            | 0.206        | 0.215        | 0.194        |
| Mean B values (Å <sup>2</sup> )                |              |              |              |
| : protein                                      | 26.04        | 24.25        | 17.65        |
| : solvent                                      | 36.91        | 32.94        | 30.69        |
| : overall                                      | 27.25        | 25.26        | 19.47        |
| Estimated overall coordinate uncertainty (Å) ‡ | 0.088        | 0.089        | 0.049        |
| Distance deviations †                          |              |              |              |
| Bond distances (Å)                             | 0.007        | 0.009        | 0.007        |
| Bond angles (°)                                | 1.036        | 1.145        | 1.064        |
| Planar groups (Å)                              | 0.003        | 0.004        | 0.003        |
| Chiral volume deviation (Å <sup>3</sup> )      | 0.068        | 0.077        | 0.071        |
| Quality of Models*                             |              |              |              |
| Ramachandran analysis %                        |              |              |              |
| Favourable                                     | 97.2         | 97.8         | 97.2         |
| Allowed                                        | 2.8          | 2.2          | 2.8          |
| Disallowed                                     | 0.0          | 0.0          | 0.0          |

‡ based on maximum likelihood.

† rms deviations from standard values

1 C. Ramakrishnan and G.N. Ramachan, *Biophys. J.*, 1965, **5**, 909-933.

2 S.C. Lovell, I.W. Davis, W.B. Adrendall, de P.I.W. Bakker, J.M. Word, M.G. Prisant, J.S. Richardson, and D.C. Richardson, *Proteins-Structure Function and Genetics.*, 2003, **50**, 437-450.

**Table S2 Copper content, molar absorptivity, and reduction potentials for CotA proteins**

| CotA      | Copper content<br><i>g atoms Cu/mol CotA</i> | $E^{\circ}$<br><i>mV</i> | $\epsilon_{330 \text{ nm}}$                           | $\epsilon_{330 \text{ nm}}$                        | $\epsilon_{609 \text{ nm}}$                           | $\epsilon_{609 \text{ nm}}$                        |
|-----------|----------------------------------------------|--------------------------|-------------------------------------------------------|----------------------------------------------------|-------------------------------------------------------|----------------------------------------------------|
|           |                                              |                          | as-isolated<br><i>mM<sup>-1</sup>.cm<sup>-1</sup></i> | oxidized<br><i>mM<sup>-1</sup>.cm<sup>-1</sup></i> | as isolated<br><i>mM<sup>-1</sup>.cm<sup>-1</sup></i> | oxidized<br><i>mM<sup>-1</sup>.cm<sup>-1</sup></i> |
| Wild type | 4.2 ± 0.1                                    | 525                      | 3.4 ± 0.1                                             | 4.4 ± 0.8                                          | 3.8 ± 0.3                                             | 3.9 ± 0.4                                          |
| E498D     | 3.7 ± 0.2                                    | 525                      | 1.0 ± 0.02                                            | 3.1 ± 0.3                                          | 1.3 ± 0.02                                            | 1.6 ± 0.1                                          |
| E498T     | 3.7 ± 0.1                                    | 521                      | 1.8 ± 0.2                                             | 3.3 ± 0.9                                          | 3.2 ± 0.7                                             | 3.4 ± 0.7                                          |
| E498L     | 3.7 ± 0.2                                    | 516                      | 1.6 ± 0.1                                             | 3.7 ± 0.2                                          | 0.8 ± 0.1                                             | 3.4 ± 0.1                                          |

**Table S3 Occupancies of copper sites in the crystal structures**

| <b>CotA /</b>      | <b>Wild type</b> | <b>E498T</b> | <b>E498L</b> | <b>E498D</b> |
|--------------------|------------------|--------------|--------------|--------------|
| <b>Copper Site</b> |                  |              |              |              |
| <b>Type 1</b>      | 1.0              | 1.0          | 1.0          | 0.7          |
| <b>Type 2</b>      | 1.0              | 0.8          | 0.3          | 1.0          |
| <b>Type 3 (x2)</b> | 1.0              | 0.8          | 0.8          | 1.0          |
